# Supplementary material
Source: Springer Nature journal article supplement (https://www.springermedizin.de/resource/supplementary/12905_2009_163_MOESM3_ESM.pdf/9519216)
Supplement: MOESM3 [file 9519216]

## **Study inclusion and exclusion criteria**

### **Inclusion**

- Symptoms of stress urinary incontinence and/or mixed urinary incontinence, predominantly stress incontinence
- Signs of stress urinary incontinence on physical examination or voiding diary
- Patient is a candidate for surgical treatment (as based on history and physical examination)
- Patient has attended at least 3 months of pelvic floor exercises
- Patient is capable to fill out bladder diaries and questionnaires and understands the Dutch written and spoken language

### **Exclusion**

- Previous incontinence surgery
- Mixed urinary incontinence, urge component is predominant
- Pelvic organ prolapse > 1cm beyond the hymen on Valsalva in supine position
- Post void urinary residual > 150ml on ultrasound or catheterisation
- Additional pelvic surgery (prolapse and/or hysterectomy)
- Patient is or wants to become pregnant
- Prior pelvic radiotherapy
